# Supplementary material for: Polymorphism of Baculoviral Inhibitor of Apoptosis Repeat-Containing 5 (BIRC5) Can Be Associated with Clinical Outcome of Non-Small Cell Lung Cancer
Source: MDPI journal article supplement (doi:10.3390/cells11060956), 2022-03-10
Supplement: s1 [file s1]

**Table S1.** Distribution of *BIRC5* (rs8073069) genotypes according to demographic and clinical factors.

| Variable                        |            | <i>Survivin</i> (rs8073069) |                          |                          |          |
|---------------------------------|------------|-----------------------------|--------------------------|--------------------------|----------|
|                                 |            | CC                          | CG                       | GG                       | <i>p</i> |
|                                 |            | <i>n</i> = 11<br>(10.6%)    | <i>n</i> = 48<br>(46.2%) | <i>n</i> = 45<br>(43.3%) |          |
| Sex                             | Male       | 7 (9%)                      | 33 (42.3%)               | 38 (48.7%)               | 0.1424   |
|                                 | Female     | 4 (15.4%)                   | 15 (57.7%)               | 7 (26.9%)                |          |
| Age [years]                     | ≥ 66.5     | 3 (5.9%)                    | 24 (47.1%)               | 24 (47.1%)               | 0.2959   |
|                                 | < 66.5     | 8 (15.1%)                   | 24 (45.3%)               | 21 (39.6%)               |          |
| Disease stage                   | III        | 4 (10.5%)                   | 16 (42.1%)               | 18 (47.4%)               | 0.8004   |
|                                 | IV         | 7 (10.6%)                   | 32 (48.5%)               | 27 (40.9%)               |          |
| Distant metastases              | No         | 4 (8.7%)                    | 19 (47.8%)               | 22 (43.5%)               | 0.5891   |
|                                 | Yes        | 7 (12.1%)                   | 29 (48.3%)               | 23 (39.6%)               |          |
| Histopathology                  | AC         | 4 (9.3%)                    | 21 (48.8%)               | 18 (41.9%)               | 0.1213   |
|                                 | SCC        | 5 (9.3%)                    | 22 (40.7%)               | 27 (50%)                 |          |
|                                 | NOS        | 2 (28.6%)                   | 5 (71.4%)                | -                        |          |
| Performance status (ECOG score) | 0          | 3 (30%)                     | 9 (50%)                  | 6 (20%)                  | 0.5321   |
|                                 | 1          | 4 (6%)                      | 26 (44.8%)               | 29 (49.2%)               |          |
|                                 | 2          | 4 (14.8%)                   | 13 (48.2%)               | 10 (37%)                 |          |
| Smoking status                  | Smoker     | 9 (9.3%)                    | 46 (47.4%)               | 42 (43.3%)               | 0.2465   |
|                                 | Non-smoker | 2 (28.6%)                   | 2 (28.6%)                | 3 (42.9%)                |          |
| Body loss [%]                   | ≥ 10%      | 4 (11.4%)                   | 13 (37.1%)               | 18 (51.4%)               | 0.4115   |
|                                 | < 10%      | 7 (10.1%)                   | 35 (50.7%)               | 27 (39.1%)               |          |

|                                      |     |            |            |            |        |
|--------------------------------------|-----|------------|------------|------------|--------|
| <b>Occupational exposure</b>         | No  | 10 (11.1%) | 43 (47.8%) | 37 (41.1%) | 0.5268 |
|                                      | Yes | 1 (7.1%)   | 5 (35.7%)  | 8 (57.1%)  |        |
| <b>Family history of any cancer</b>  | No  | 2 (4.2%)   | 23 (47.9%) | 23 (47.9%) | 0.1375 |
|                                      | Yes | 9 (16.1%)  | 25 (44.6%) | 22 (39.3%) |        |
| <b>Family history of lung cancer</b> | No  | 6 (7.8%)   | 38 (49.4%) | 33 (42.9%) | 0.2414 |
|                                      | Yes | 5 (18.5%)  | 10 (37%)   | 12 (44.4%) |        |

Abbreviations: AC, adenocarcinoma; NOS, not otherwise specified; SCC, squamous cell carcinoma; ECOG, Eastern Cooperative Oncology Group.
